# Supplementary material
Source: PubMed Central journal article supplement (PMC5460530)
Supplement: NIHMS858832-supplement-Tables.pdf [file NIHMS858832-supplement-Tables.pdf]

Table S1

Hospital Characteristics and Autonomy Scores ( $n = 570$ )

|                   | Number of hospitals | %    | Autonomy score | SD   | <i>p</i> value |
|-------------------|---------------------|------|----------------|------|----------------|
| All hospitals     | 570                 | 100  | 2.81           | 0.23 |                |
| Technology status |                     |      |                |      |                |
| High tech         | 254                 | 44.6 | 2.82           | 0.23 | 0.203          |
| Non high tech     | 316                 | 55.4 | 2.80           | 0.24 |                |
| Teaching status   |                     |      |                |      |                |
| Nonteaching       | 290                 | 50.9 | 2.82           | 0.23 | 0.390          |
| Minor teaching    | 235                 | 41.2 | 2.78           | 0.23 |                |
| Major teaching    | 45                  | 7.9  | 2.83           | 0.27 |                |
| Size              |                     |      |                |      |                |
| Small (<100)      | 58                  | 10.2 | 2.87           | 0.26 | 0.007          |
| Medium (101-250)  | 256                 | 44.9 | 2.77           | 0.25 |                |
| Large (>250)      | 256                 | 44.9 | 2.83           | 0.21 |                |

Table S2

Characteristics of Surgical Patients ( $n = 1,222,870$ )

|                                             | Number   | %             |
|---------------------------------------------|----------|---------------|
| Inpatient death within 30 days of admission | 24,890   | 2.04          |
| Age (mean; SD)                              | 122,2870 | 60.61 (17.46) |
| Male                                        | 526,633  | 43.07         |
| Emergency admissions                        | 476,100  | 38.95         |
| Surgical categories                         |          |               |
| General                                     | 519,900  | 42.51         |
| Orthopedic                                  | 634,918  | 51.92         |
| Vascular                                    | 68,052   | 5.56          |
| Comorbidities                               |          |               |
| Congestive heart failure                    | 66,386   | 5.43          |
| Valvular disease                            | 57,850   | 4.73          |
| Pulmonary circulation disease               | 12,453   | 1.02          |
| Peripheral vascular disease                 | 52,789   | 4.32          |
| Other neurological disorders                | 50,207   | 4.11          |
| Paralysis                                   | 16,678   | 1.36          |
| Chronic pulmonary disease                   | 178,353  | 14.58         |
| Diabetes without complications              | 179,808  | 14.70         |
| Diabetes with chronic complications         | 39,927   | 3.27          |
| Hypothyroidism                              | 113,415  | 9.27          |
| Renal failure                               | 57,222   | 4.68          |
| Liver disease                               | 27,830   | 2.28          |
| Peptic ulcer disease with bleeding          | 827      | 0.07          |
| Acquired Immunodeficiency Syndrome (AIDS)   | 1,989    | 0.16          |
| Lymphoma                                    | 5,547    | 0.45          |
| Metastatic cancer                           | 41,580   | 3.40          |
| Solid tumor w/o metastasis                  | 14,549   | 1.19          |
| Rheumatoid arthritis                        | 28,299   | 2.31          |
| Obesity                                     | 100,284  | 8.20          |
| Weight loss                                 | 21,878   | 1.79          |
| Chronic blood loss anemia                   | 20,428   | 1.67          |
| Deficiency anemias                          | 160,877  | 13.16         |
| Alcohol abuse                               | 28,375   | 2.32          |
| Drug abuse                                  | 16,777   | 1.37          |
| Psychoses                                   | 22,477   | 1.84          |
| Depression                                  | 85,279   | 6.97          |
| Hypertension                                | 585,648  | 47.89         |

Table S3

## Odds Ratio Indicating Effect of Autonomy on 30 Day Mortality and Failure to Rescue

| Patient outcome   | Bivariate<br>OR (95% CI) | Model including patient<br>characteristics<br>OR (95% CI) | Model including patient<br>and hospital<br>characteristics<br>OR (95% CI) |
|-------------------|--------------------------|-----------------------------------------------------------|---------------------------------------------------------------------------|
| 30 day mortality  | 0.68<br>(0.59-0.78)***   | 0.81<br>(0.71-0.92)***                                    | 0.81<br>(0.71-0.91)***                                                    |
| Failure to rescue | 0.73<br>(0.63-0.84)***   | 0.84<br>(0.74-0.95)**                                     | 0.83<br>(0.74-0.95)**                                                     |

Note. \* $p < 0.05$ ; \*\* $p < 0.01$ ; \*\*\* $p < 0.001$

---

### Autonomy, by Hospital

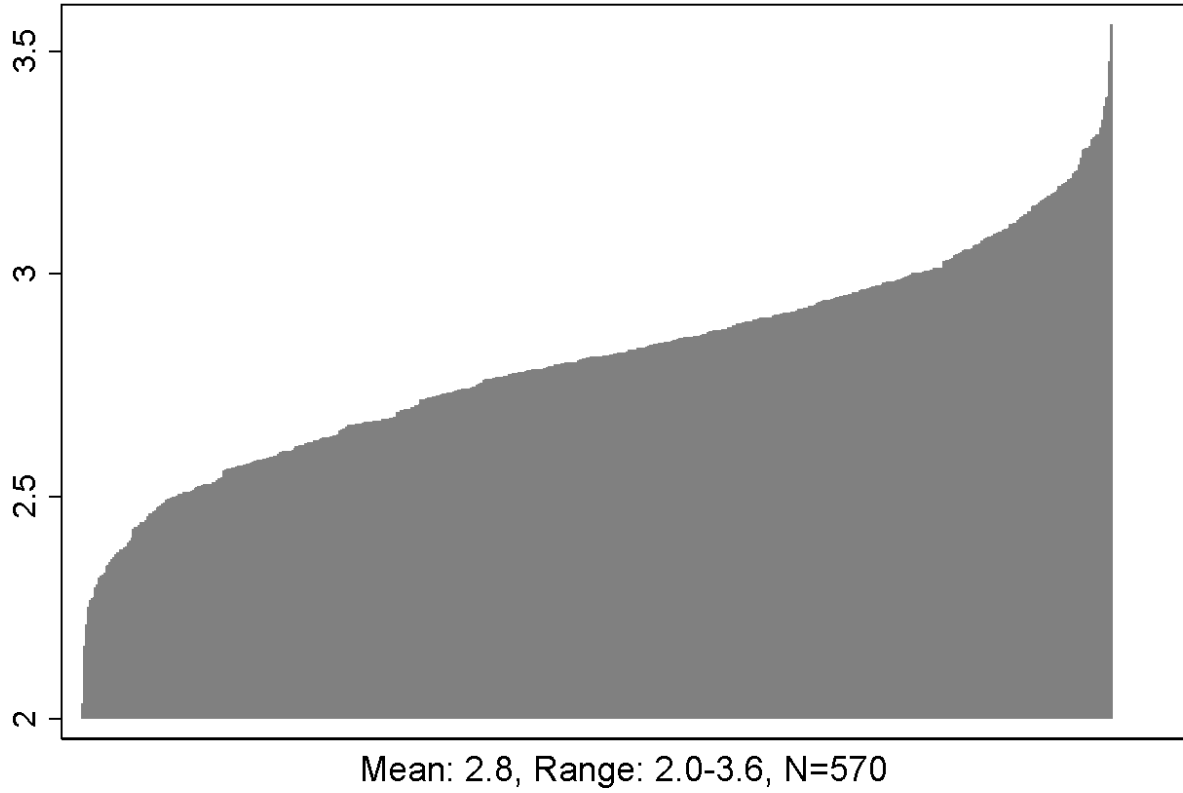

---

Each bar represents one hospital

Figure S1. Distribution of autonomy by hospital.
